# Supplementary material for: Outcomes of Extracorporeal Membrane Oxygenation in COVID-19–Induced Acute Respiratory Distress Syndrome: An Inverse Probability Weighted Analysis
Source: PubMed Central journal article supplement — Crit Care Explor. 2022 Oct 7;4(10):e0770. doi: 10.1097/CCE.0000000000000770 (PMC9553386; doi:10.1097/cce.0000000000000770), 2022-10-07

## Supplementary materials ETALON II

### **Outcomes of Extracorporeal Membrane Oxygenation in COVID-19 Induced Acute Respiratory Distress Syndrome: an Inverse Probability Weighted Analysis**

Senta Jorinde Raasveld, Fabio Silvio Taccone, Lars Mikael Broman, Greet Hermans, Philippe Meersseman, Manuel Quintana Diaz, Thijs S.R. Delnoij, Marcel van de Poll, Elisa Gouvea Bogossian, Floor F. van Baarle, Koray Durak, Rashad Zayat, Annemieke Oude Lansink-Hartgring, Christiaan L. Meuwese, Joris van der Heijden, Erwin de Troy, Dieter Dauwe, Erik Scholten, Franciska van der Velde, Jacinta J. Maas, Dinis Dos Reis Miranda, Marijn Kuijpers, Judith van den Brule, Walter M. van den Bergh, Alexander P.J. Vlaar

#### **Contents**

|                                                                  |    |
|------------------------------------------------------------------|----|
| Appendix I. Definitions.....                                     | 2  |
| Appendix II. Missing data per variable: alphabetical order ..... | 7  |
| Appendix III. Directed acyclic graph.....                        | 8  |
| Appendix IV. Inverse Probability Weighting .....                 | 9  |
| Appendix V. Sensitivity analysis .....                           | 11 |
| Appendix VI. Flowchart.....                                      | 13 |
| Appendix VII. COVID-19 related therapies during ECMO .....       | 13 |
| Appendix VIII. COVID-19 vs. non-COVID-19.....                    | 14 |
| Appendix IX. Survival curves .....                               | 15 |

## Appendix I. Definitions

### Baseline/demographics

|                                    |                                                                                                                                                                                                                                                                                                                                                                                                                                                                                 |
|------------------------------------|---------------------------------------------------------------------------------------------------------------------------------------------------------------------------------------------------------------------------------------------------------------------------------------------------------------------------------------------------------------------------------------------------------------------------------------------------------------------------------|
| <i>Active malignancy</i>           | Currently receiving active antimitotic treatment;<br><br><b>or</b> diagnosed within the past 6 months;<br><br><b>or</b> recurrent or metastatic;<br><br><b>or</b> inoperable.                                                                                                                                                                                                                                                                                                   |
| <i>Asthma</i>                      | Inflammatory disease of the airways, characterized by reversible airflow obstruction and triggered bronchospasms. Asthma must have been recorded prior to this current hospital-admission and the patient must be using medication indicated for asthma.                                                                                                                                                                                                                        |
| <i>Chronic kidney disease (1)</i>  | Increased serum creatinine value > 177 µmol/L (> 2.0 mg/dL).<br><br>This renal insufficiency must have been recorded prior to this current hospital-admission as a chronic condition.                                                                                                                                                                                                                                                                                           |
| <i>COPD (2)</i>                    | Chronic (over 6 months) usage of bronchodilator drugs or steroids indicated for chronic pulmonary diseases. COPD must have been recorded prior to this current hospital-admission and the patient must be using medication indicated for COPD.<br><br>E.g. chronic bronchitis, chronic bronchiolitis and emphysema.                                                                                                                                                             |
| <i>COVID-19</i>                    | PCR-proven Coronavirus disease 2019, caused by the novel coronavirus (2019-nCoV), also known as severe acute respiratory syndrome coronavirus 2 (SARS-CoV-2).                                                                                                                                                                                                                                                                                                                   |
| <i>Diabetes mellitus (3)</i>       | Medication-dependent type of diabetes mellitus.<br><br>Diagnosis must be recorded prior to this current hospital-admission.                                                                                                                                                                                                                                                                                                                                                     |
| <i>Hypertension</i>                | Diagnosis must be recorded prior to this current hospital-admission.                                                                                                                                                                                                                                                                                                                                                                                                            |
| <i>Immunocompromised state (4)</i> | Medical history of at least one of the following conditions:<br><br>(1) use of immunosuppression for over 3 months (defined as viral immunosuppression, neoplastic disease, immunosuppressive drugs including steroids, chemotherapy, or congenital immunosuppression);<br><br>(2) active hematologic malignancy (i.e., still requiring treatment);<br><br>and (3) active neoplasm (i.e., a neoplasm that has not been resected, still requires treatment, or with metastasis). |
| <i>Liver cirrhosis (5)</i>         | Pathological proven cirrhosis (through biopsy); <b>or</b> previous episodes of upper gastro-intestinal tract bleeding due to                                                                                                                                                                                                                                                                                                                                                    |

portal hypertension; **or** previous episodes of liver failure, coma or hepatic encephalopathy.

Diagnosis must be recorded prior to this current hospital-admission.

*Myocardial infarction*

Diagnosis must be recorded prior to this current hospital-admission.

*Pulmonary hypertension*

Presence of a mean pulmonary arterial pressure >20 mmHg

(6)

Diagnosis must be recorded prior to this current hospital-admission

## ECMO & COVID-19

*Acute kidney injury* (7)

Increase in serum creatinine by  $\geq 26.5 \mu\text{mol/L}$  ( $\geq 0.3 \text{ mg/dL}$ ) within 48 hours;

**or** increase in serum creatinine to  $\geq 1.5$  times baseline, which is known

**or** presumed to have occurred within the prior 7 days.

*ECCO<sub>2</sub>R* (8)

Extracorporeal carbon dioxide removal (ECCO<sub>2</sub>R) is the provision of carbon dioxide exchange through the use of an extracorporeal circuit consisting minimally of an optional blood pump artificial lung and vascular access cannulas using blood flows lower than required for oxygenation support.

*FiO<sub>2</sub>*

Fraction of inspired oxygen, the molar or volumetric fraction of oxygen in the inhaled gas, provided by the mechanical ventilator.

*Mechanical ventilation*

Implementation of a ventilator during ICU-admission, deriving from a physical connection between the patient and the mechanical ventilator. The respiratory minute volume has to be measured by the ventilator. Mechanical ventilation does include continuous positive airway pressure (CPAP), but does **not** include high-flow nasal oxygen. Mechanical ventilation can be delivered via an endotracheal, tracheostomy or nasal tube.

*P/F ratio*

The ratio of arterial oxygen partial pressure (PaO<sub>2</sub> in mmHg) to fractional inspired oxygen (FiO<sub>2</sub> expressed as a fraction, not a percentage).

*Peak pressure* (9)

Peak pressure is measured at the airway opening and is routinely displayed by mechanical ventilators. It represents the total pressure needed to push a volume of gas into the lung and is composed of pressures resulting from inspiratory flow resistance (resistive pressure), the elastic recoil of the lung and chest wall (elastic pressure), and the alveolar pressure present at the beginning of the breath.

|                                       |                                                                                                                                                                                                                                                                                                                                    |
|---------------------------------------|------------------------------------------------------------------------------------------------------------------------------------------------------------------------------------------------------------------------------------------------------------------------------------------------------------------------------------|
| <i>Pulmonary embolism</i>             | Closure of a pulmonary artery or one of its branches, caused by a blood-borne clot or foreign material that plugs the vessel. It has to be shown and proven on imaging, e.g. CAT-scan.                                                                                                                                             |
| <i>Renal replacement therapy</i> (10) | Management of renal function in case of e.g. acute or chronic kidney injury, provided via among others continuous renal replacement therapy (CRRT), hemodialysis, peritoneal dialysis, hemofiltration, hemodiafiltration, isolated ultrafiltration, plasmapheresis, hemoperfusion or plasmaperfusion.                              |
| <i>Second run</i>                     | Non-successful weaning, resulting in re-cannulation and re-initiation of ECMO after 6- 48 hours of de-cannulation. In case re-cannulation and re-initiation of ECMO occurs within 6 hours of removal of the cannulas, it is assumed as part of the first run.                                                                      |
| <i>VVA-ECMO</i> (11)                  | A hybrid configuration of VV and VA extracorporeal support in which the extracorporeal circuit drains blood from the venous system and reinfuses into both the venous and systemic arterial systems. VVA ECMO provides both pulmonary (VV component) and cardiac (VA component) in patients with combined cardiopulmonary failure. |

## Complications & outcome

|                                                          |                                                                                                                                                                                                                                                                                                                |
|----------------------------------------------------------|----------------------------------------------------------------------------------------------------------------------------------------------------------------------------------------------------------------------------------------------------------------------------------------------------------------|
| <i>Acute kidney injury</i>                               | <p>Increase in serum creatinine by <math>\geq 26.5 \mu\text{mol/L}</math> (<math>\geq 0.3 \text{ mg/dL}</math>) within 48 hours;</p> <p><b>or</b> increase in serum creatinine to <math>\geq 1.5</math> times baseline, which is known</p> <p><b>or</b> presumed to have occurred within the prior 7 days.</p> |
| <i>Hemorrhagic event</i> (12)                            | <p>Bleeding resulting into:</p> <ol style="list-style-type: none"> <li>1) Surgical exploration or intervention by interventional radiologist; <b>or</b></li> <li>2) Required immediate transfusion of <math>&gt;3</math> units red blood cells per calendar day.</li> </ol>                                    |
| <i>Mortality location: anticipated death during ECMO</i> | ECMO withdrawal in anticipation of death                                                                                                                                                                                                                                                                       |
| <i>New infection</i>                                     | <p>Culture (i.e. blood, respiratory tract) proven new infection during ECMO-run,</p> <p><b>or</b> suspicion of infection, with an indication for treatment.</p>                                                                                                                                                |
| <i>Pulmonary embolism</i>                                | Closure of a pulmonary artery or one of its branches, caused by a blood-borne clot or foreign material that plugs the vessel. It has to be shown and proven on imaging, e.g. CAT-scan.                                                                                                                         |
| <i>Renal replacement therapy</i> (10)                    | Management of renal function in case of e.g. acute or chronic kidney injury, provided via among others continuous renal replacement therapy (CRRT), hemodialysis, peritoneal dialysis, hemofiltration,                                                                                                         |

hemodiafiltration, isolated ultrafiltration, plasmapheresis, hemoperfusion or plasmaperfusion.

|                                             |                                                                                                                                                                                                                                                                                                                                                     |
|---------------------------------------------|-----------------------------------------------------------------------------------------------------------------------------------------------------------------------------------------------------------------------------------------------------------------------------------------------------------------------------------------------------|
| <i>Successful weaning</i> (13)              | Survival for >48 hours after ECMO removal.                                                                                                                                                                                                                                                                                                          |
| <i>Thrombotic event (arterial)</i>          | Any symptomatic event in the patient (e.g. leg ischemia, stroke), proven by imaging and/or clinical presentation.                                                                                                                                                                                                                                   |
| <i>Thrombotic event (mechanical)</i>        | Thrombosis in cannula, pump or oxygenator.                                                                                                                                                                                                                                                                                                          |
| <i>Thrombotic event (venous)</i>            | Thrombosis in vein(s), for example deep venous thrombosis in upper or lower extremities, proven by imaging (e.g. ultrasound) or in case of newly initiated treatment due to high clinical suspicion.                                                                                                                                                |
| <i>Ventilator-associated pneumonia</i> (14) | Ventilator-associated pneumonia (VAP) is defined as pneumonia that occurs > 48 hours or thereafter following endotracheal intubation, characterized by the presence of a new or progressive infiltrate, signs of systemic infection (fever, altered white blood cell count), changes in sputum characteristics, and detection of a causative agent. |

#### Definitions: laboratory values

|                        |        |
|------------------------|--------|
| <i>pCO<sub>2</sub></i> | kPa    |
| <i>bicarbonate</i>     | mmol/L |
| <i>procalcitonin</i>   | ng/mL  |
| <i>pO<sub>2</sub></i>  | kPa    |
| <i>lactate</i>         | mmol/L |
| <i>CRP</i>             | mg/L   |

#### List of abbreviations

|                          |                                                   |
|--------------------------|---------------------------------------------------|
| <i>ARDS</i>              | acute respiratory distress syndrome               |
| <i>AKI</i>               | acute kidney injury                               |
| <i>BMI</i>               | body mass index                                   |
| <i>COVID-19</i>          | coronavirus disease 2019                          |
| <i>ECMO</i>              | extracorporeal membrane oxygenation               |
| <i>ECCO<sub>2</sub>R</i> | extracorporeal carbon dioxide removal             |
| <i>ELSO</i>              | Extracorporeal Life Support Organization          |
| <i>EOLIA</i>             | ECMO to Rescue Lung Injury in Severe ARDS         |
| <i>ICU</i>               | intensive care unit                               |
| <i>IPW</i>               | Inverse probability weighting                     |
| <i>PCR</i>               | polymerase chain reaction test                    |
| <i>RRT</i>               | renal replacement therapy                         |
| <i>SOFA</i>              | sequential organ failure assessment               |
| <i>SMD</i>               | standardized mean difference                      |
| <i>VA-ECMO</i>           | veno arterial extracorporeal membrane oxygenation |
| <i>VILI</i>              | ventilator induced lung injury                    |
| <i>VV-ECMO</i>           | veno venous extracorporeal membrane oxygenation   |

## REFERENCES

1. Stichting NICE: Data Dictionary; chronische nierinsufficiëntie.
2. NICE: Data Dictionary; Chronische Obstructieve Long Ziekte.
3. Stichting NICE: Data Dictionary; diabetes.
4. Cortegiani A, Madotto F, Gregoretti C, Bellani G, Laffey JG, Pham T, et al. Immunocompromised patients with acute respiratory distress syndrome: secondary analysis of the LUNG SAFE database. *Crit Care*. 2018;22(1):157.
5. Stichting NICE: Data Dictionary; Cirrhose.
6. Simonneau G, Montani D, Celermajer DS, Denton CP, Gatzoulis MA, Krowka M, et al. Haemodynamic definitions and updated clinical classification of pulmonary hypertension. *Eur Respir J*. 2019;53(1).
7. International Society of Nephrology. Chapter 5.4: Vascular access for renal replacement therapy in AKI. *KDIGO Clin Pract Guidel Acute Kidney Inj*. 2012;2(1):3.
8. Broman LM, Taccone FS, Lorusso R, Malfertheiner MV, Pappalardo F, DI Nardo M, et al. The ELSO Maastricht Treaty for ECLS Nomenclature: Abbreviations for cannulation configuration in extracorporeal life support - A position paper of the Extracorporeal Life Support Organization. *Crit Care*. 2019;23(1):1–9.
9. Hamilton Medical: measured values for Ppeak and Pplateau.
10. Neri M, Villa G, Garotto F, Al. E. Nomenclature for renal replacement therapy in acute kidney injury: basic principles. *Crit Care*. 2016;20(318).
11. Conrad SA, Broman LM, Taccone FS, Lorusso R, Malfertheiner M V., Pappalardo F, et al. The extracorporeal life support organization Maastricht treaty for nomenclature in extracorporeal life support a position paper of the extracorporeal life support organization. *Am J Respir Crit Care Med*. 2018;198(4):447–51.
12. Extracorporeal Life Support Organization ( ELSO ) ELSO Registry Data Definitions For all comments , questions and concerns please email Peter Rycus at prycus@elso.org. 2018;
13. Omar HR, Mirsaeidi M, Socias S, Sprenker C, Caldeira C, Camporesi EM, et al. Plasma free hemoglobin is an independent predictor of mortality among patients on extracorporeal membrane oxygenation support. *PLoS One*. 2015 Apr 22;10(4).
14. Kalanuria AA, Zai W, Mirski M. Ventilator-associated pneumonia in the ICU. *Crit Care*. 2014;18(2).

## Appendix II. Missing data per variable: alphabetical order

| Missing data                   |             |                    |
|--------------------------------|-------------|--------------------|
|                                | No. missing | Percentage missing |
| Age                            | 0           | 0.0                |
| AKI                            | 0           | 0.0                |
| Asthma                         | 0           | 0.0                |
| BMI                            | 10          | 3.2                |
| CKD                            | 1           | 0.3                |
| Comorbidity count              | 0           | 0.0                |
| COPD                           | 0           | 0.0                |
| COVID part of indication       | 0           | 0.0                |
| CVD                            | 1           | 0.3                |
| Days till death                | 0           | 0.0                |
| DM                             | 0           | 0.0                |
| Duration ICU - initiation ECMO | 12          | 3.9                |
| ECMO duration, days            | 13          | 4.2                |
| Gender                         | 0           | 0.0                |
| Hemorrhagic complication       | 1           | 0.3                |
| Hypertension                   | 0           | 0.0                |
| Infectious event               | 0           | 0.0                |
| Institute                      | 0           | 0.0                |
| Lactate level pre-ECMO         | 59          | 19.1               |
| Liver cirrhosis                | 1           | 0.3                |
| Malignancy                     | 1           | 0.3                |
| MCI                            | 0           | 0.0                |
| Mechanical thrombotic event    | 1           | 0.3                |
| P/F ratio                      | 53          | 17.2               |
| Pulmonary disease patient      | 1           | 0.3                |
| Pulmonary hypertension         | 0           | 0.0                |
| RRT                            | 0           | 0.0                |
| Second run                     | 0           | 0.0                |
| SOFA-score                     | 77          | 24.9               |
| Status at 60 days              | 0           | 0.0                |
| Successful weaning             | 2           | 0.6                |
| Total no. of complications     | 0           | 0.0                |
| Venous thrombotic event        | 1           | 0.3                |
| Year ICU admission             | 0           | 0.0                |

**Abbreviations:** AKI, acute kidney injury; COVID, coronavirus-disease 2019; COPD, chronic obstructive pulmonary disease; DM, diabetes mellitus; MCI, myocardial infarction; RRT, renal replacement therapy; ICU, intensive care unit; CKD, chronic kidney disease; CVD, cardiovascular disease; BMI, body mass index; ECMO, extracorporeal membrane oxygenation; SOFA, sequential organ failure assessment

### Appendix III. Directed acyclic graph

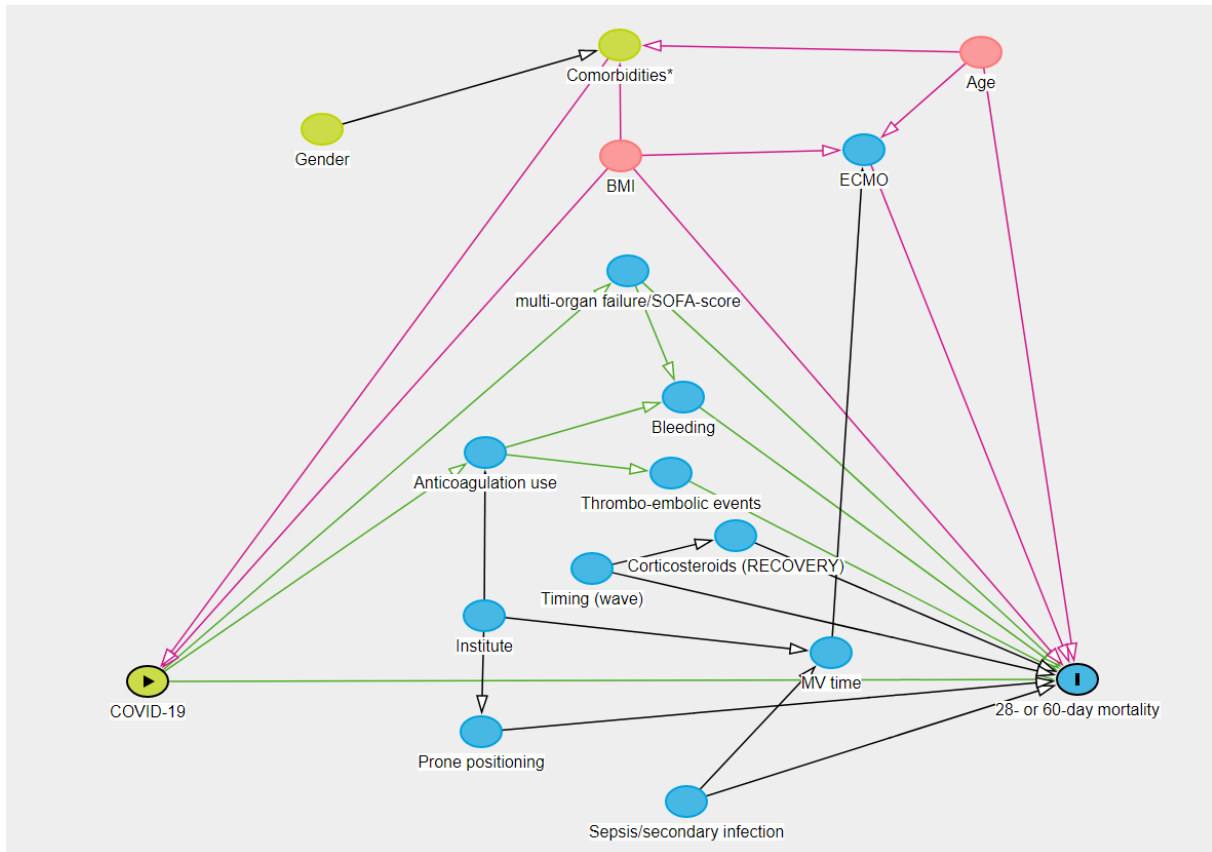

Directed acyclic graph (DAG) based on the influence of the presence of COVID-19 as cause for ARDS on survival. Green consists of (ancestor of) exposure, blue of (ancestor of) outcome and pink of ancestor of exposure and outcome, and thus as confounder. Minimal sufficient adjustment sets for estimating the total effect of COVID-19 on survival resulting from this DAG are:

- Age
- BMI
- Comorbidities: COPD, diabetes, hypertension, pulmonary hypertension, myocardial infarction, chronic kidney disease, other pulmonary diseases, liver cirrhosis

Additionally, the variable institute was incorporated in further IPW analysis.



## Appendix IV. Inverse Probability Weighting

### a. Inverse probability weighting

Confounding is an important pitfall in estimating a causal effect. There are different methods available to remove confounding. One of the conventional methods used is covariate adjustment using a regression model. However, such a regression model is prone to overfitting when too many covariates are included, resulting in reduced efficiency and accuracy of the model. Covariates can also be used to calculate the propensity score (PS), which is defined as the probability of a patient being exposed to the “dependent variable” (e.g. treatment, intervention, exposure to COVID-19), given this set of observed covariates. By summarizing all covariates in one single covariate, using the propensity score reduces the potential for overfitting. The PS is calculated by either using logistic regression or classification and regression tree analysis.

The PS can be used in different methods, such as stratification, propensity score matching (PSM) and inverse probability weighting (IPW). IPW can be used for estimating the average treatment effect (ATE): the effect of the treatment/exposure/intervention in the scenario that every patient in the population was offered treatment/exposure/intervention. In IPW, weights are assigned to patients based on the inverse of the PS. This results in a pseudo-population, in which patients with a high probability of the treatment/exposure/intervention are assigned a larger weight. This results in an independent distribution of covariates used to calculate the PS of the treatment/exposure/intervention assignment.

The weight is calculated by  $\frac{1}{PS}$  if the patient is a member of the treatment/exposure/intervention group, and  $\frac{1}{(1-PS)}$  if the patient is a member of the comparator group. In this resulting pseudo population, the balance of the covariates used to calculate the PS have to be compared, for example by calculating the standardized mean differences (SMD) prior and after weighting: a SMD of 0-0.1 is considered in balance. Finally, the analysis can be performed in the pseudo population to assess the primary outcome.

#### References used:

Allan V, Ramagopalan SV, Mardekian J, Jenkins A, Li X, Pan X, Luo X Propensity Score Matching and Inversely Probability of Treatment Weighting to Address Confounding by Indication in Comparative Effectiveness Research of Oral Anticoagulants. *J Comp Eff Res.* 2020, 9(9):603-614

Austin PC An Introduction to Propensity Score Methods for Reducing the Effects of Confounding in Observational Studies, *Multivariate Behavioral Research*, 2011 46:3, 399-424, DOI: 10.1080/00273171.2011.568786

Desai RJ, Franklin JM. Alternative Approaches For Confounding Adjustment in Observational Studies Using Weighting Based on the Propensity Score: a Primer for Practitioners. *BMJ* 2019;367:l5657

Elze ME, Gregson J, Baber U, Williamson E, Sartori S, Mehran R, Nichols M, Stone GW, Pocock SJ Comparison of Propensity Score Methods and Covariate Adjustment, Evaluation in 4 Cardiovascular Studies. *Journal of the American College of Cardiology.* 2017 Jan 24;69(3):345-57

**b. Table**

| Covariate balance after IPW |                              |                    |
|-----------------------------|------------------------------|--------------------|
| Covariate                   | Standardized mean difference |                    |
|                             | <i>Unweighted</i>            | <i>Weighted</i>    |
|                             | COVID vs non-COVID           | COVID vs non-COVID |
| Age                         | 0.011                        | 0.014              |
| BMI                         | 0.306                        | 0.052              |
| COPD                        | 0.145                        | 0.039              |
| Diabetes                    | 0.548                        | 0.064              |
| Hypertension                | 0.301                        | 0.056              |
| Pulmonary hypertension      | 0.014                        | 0.020              |
| Myocardial infarction       | 0.084                        | 0.054              |
| Institute                   | 0.914                        | 0.455              |
| Gender                      | 0.315                        | 0.038              |
| Chronic kidney disease      | 0.037                        | 0.002              |
| Other pulmonary disease     | 0.113                        | 0.025              |
| Liver cirrhosis             | 0.016                        | 0.001              |
| <i>Squared continuous</i>   |                              |                    |
| Age                         | 0.009                        | 0.014              |
| BMI                         | 0.289                        | 0.052              |

BMI, body mass index; COPD, chronic obstructive pulmonary disease; IPW, inverse probability weighting

**c. Figure**

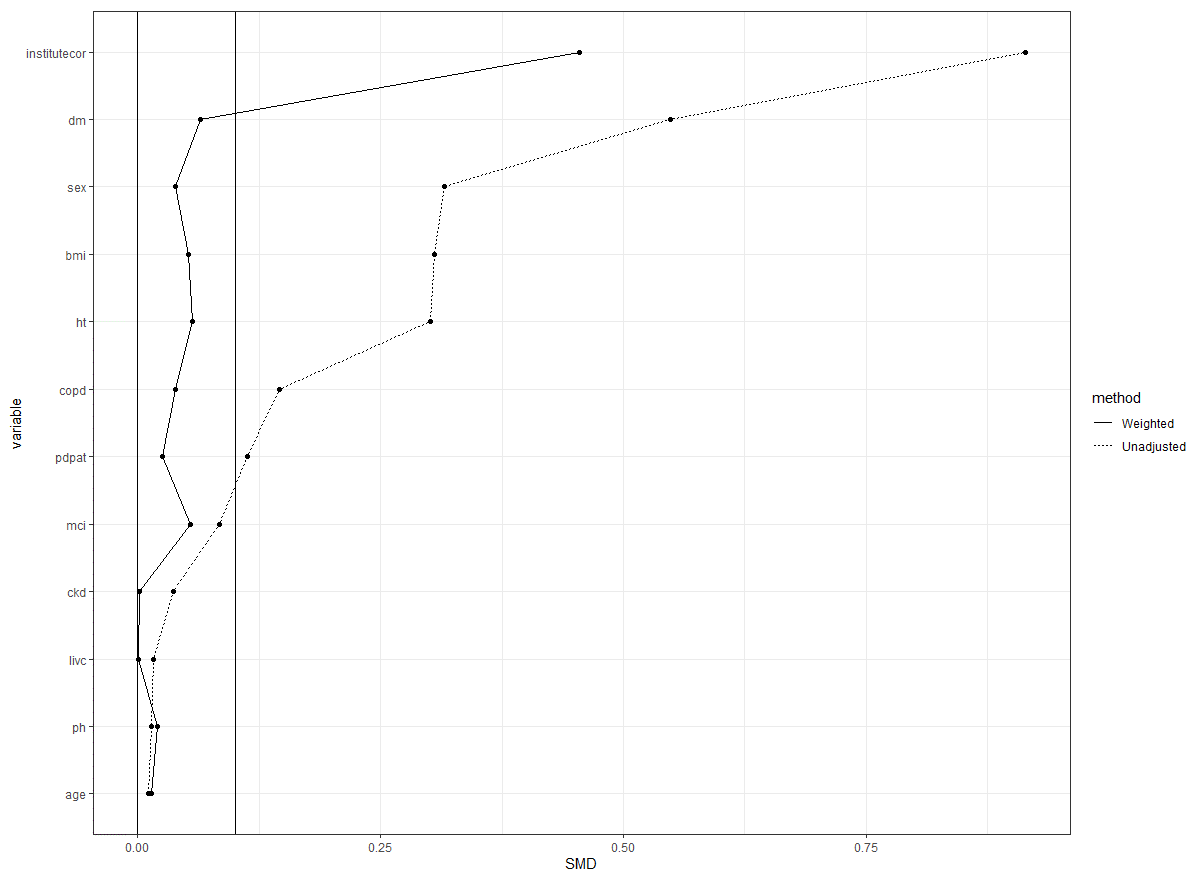

## Appendix V. Sensitivity analysis

### a. Table

| Sensitivity analysis (logistic regression) |       |              |       |
|--------------------------------------------|-------|--------------|-------|
|                                            | OR    | 95% CI       | df    |
| Intercept                                  | 8.17  | (3.81-17.50) | 233   |
| Non-COVID ARDS                             | (ref) | (ref)        | (ref) |
| COVID-ARDS                                 | 0.78  | (0.15-4.08)  | 279   |
| Age, years                                 | 0.96  | (0.14-6.70)  | 280   |
| BMI, kg/m <sup>2</sup>                     | 1.00  | (0.14-6.93)  | 122   |
| Female gender                              | (ref) | (ref)        | (ref) |
| Male gender                                | 1.33  | (0.25-6.90)  | 277   |
| No comorbidity                             | (ref) | (ref)        | (ref) |
| COPD, yes                                  | 1.08  | (0.30-3.89)  | 275   |
| DM, yes                                    | 1.82  | (0.38-8.85)  | 279   |
| Hypertension, yes                          | 1.81  | (0.36-9.04)  | 279   |
| Pulmonary hypertension, yes                | 1.15  | (0.50-2.66)  | 280   |
| Myocardial infarction, yes                 | 1.38  | (0.35-5.49)  | 280   |
| CKD                                        | 0.31  | (0.09-1.09)  | 279   |
| Pulmonary disease                          | 0.76  | (0.17-3.34)  | 273   |
| Liver cirrhosis                            | 0.26  | (0.12-0.55)  | 280   |
| Sponsor hospital                           | (ref) | (ref)        | (ref) |
| Center #2                                  | 0.59  | (0.16-2.15)  | 280   |
| Center #3                                  | 0.60  | (0.20-1.78)  | 280   |
| Center #4                                  | 0.67  | (0.19-2.22)  | 280   |
| Center #5                                  | 0.00  | (0.00 - inf) | 280   |
| Center #6                                  | 3.41  | (0.98-11.82) | 280   |
| Center #7                                  | 2.28  | (0.70-7.42)  | 280   |
| Center #8                                  | 2.40  | (0.66-8.64)  | 280   |
| Center #9                                  | 0.59  | (0.19-1.91)  | 280   |
| Center #10                                 | 0.00  | (0.00 - inf) | 280   |
| Center #11                                 | 2.85  | (0.97-8.41)  | 280   |
| Center #12                                 | 2.64  | (0.83-8.45)  | 280   |
| Center #13                                 | 1.23  | (0.37-4.12)  | 280   |
| Center #14                                 | 2.49  | (0.87-7.11)  | 280   |
| Center #15                                 | 0.52  | (0.14-1.87)  | 280   |

Abbreviations: ARDS, acute respiratory distress syndrome; BMI, body mass index; COPD, chronic obstructive pulmonary disease; CKD; chronic kidney disease; DM, diabetes mellitus; inf, infinite; ref, reference.

### b. Figure

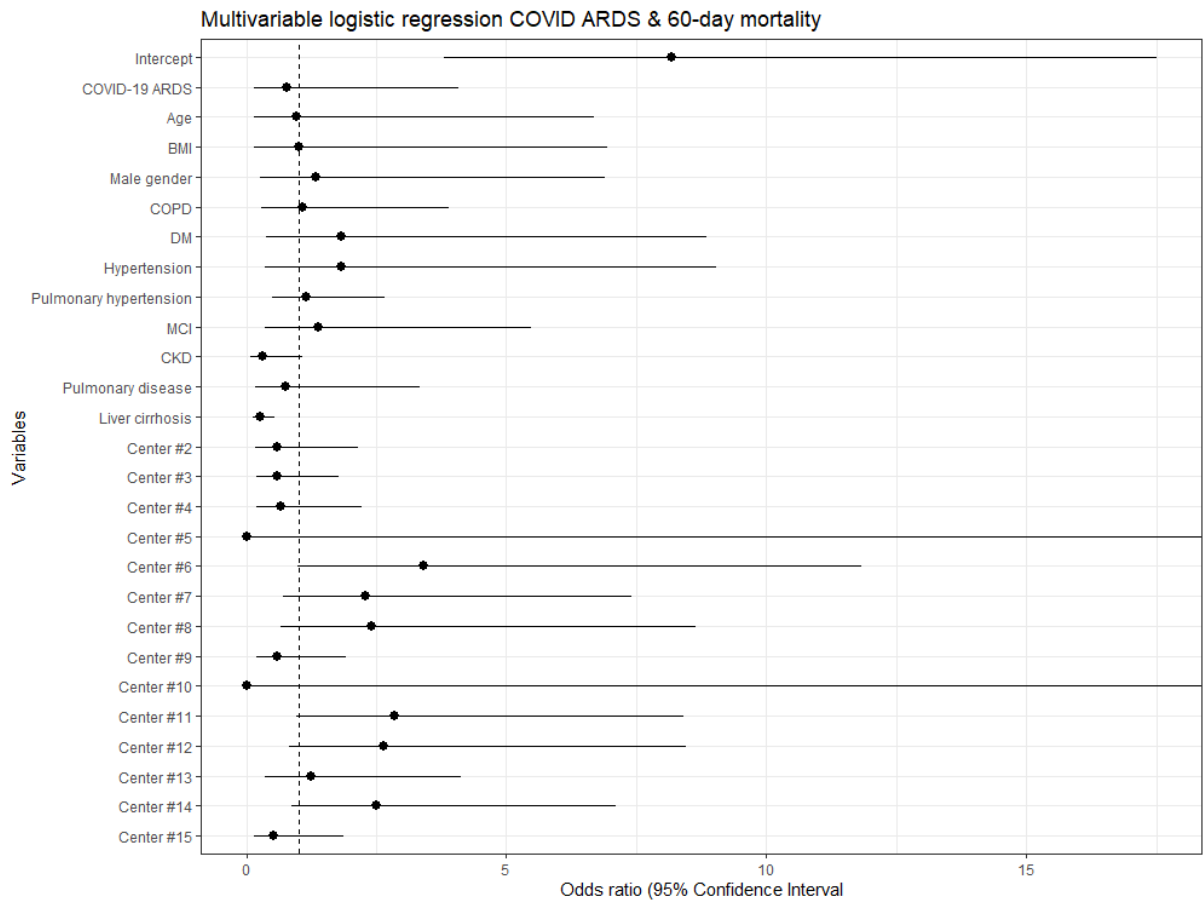

**Abreviations:** ARDS, acute respiratory distress syndrome; BMI, body mass index; CKD, chronic kidney disease; COPD, chronic obstructive pulmonary disease; COVID-19, coronavirus-disease 2019; DM, diabetes mellitus; MCI, myocardial infarction.

## Appendix VI. Flowchart

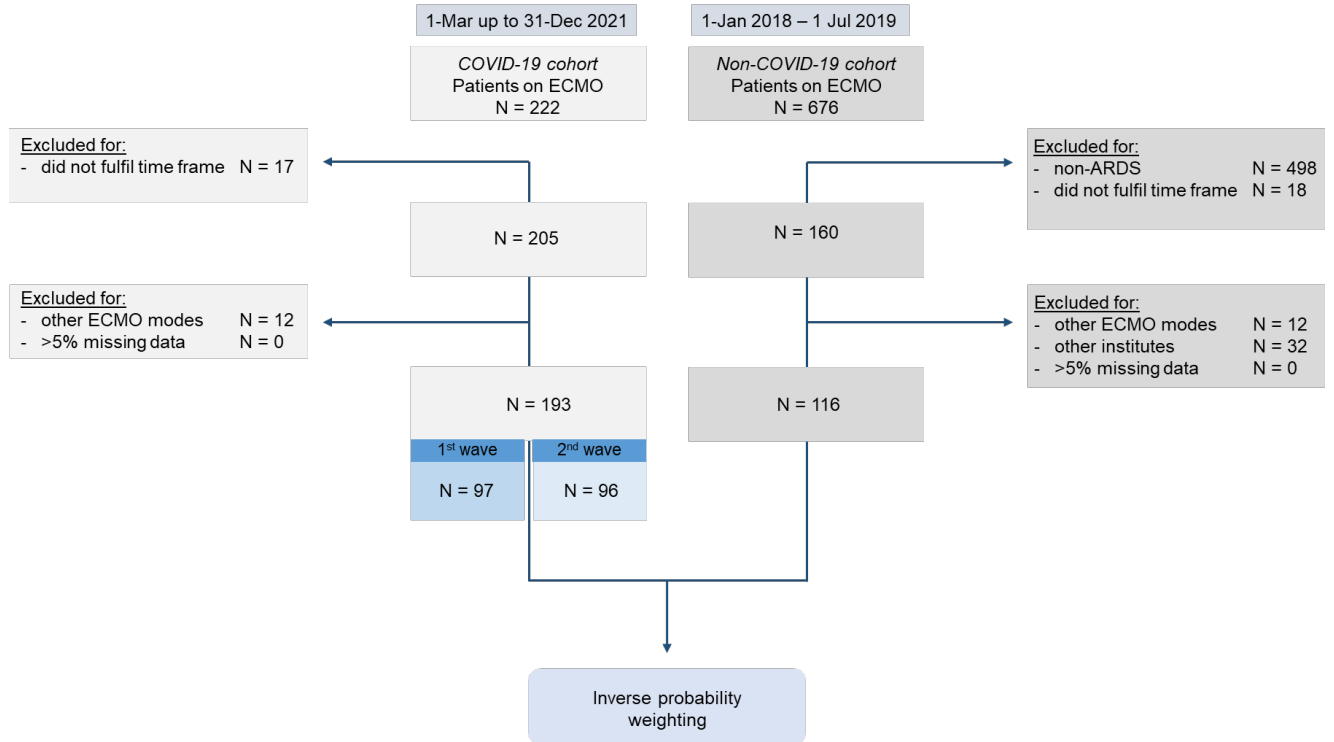

## Appendix VII. COVID-19 related therapies during ECMO

| COVID-19 related therapies                       |          |       |            |       |             |       |                  |
|--------------------------------------------------|----------|-------|------------|-------|-------------|-------|------------------|
|                                                  | COVID-19 |       | First wave |       | Second wave |       | P-value          |
|                                                  | N = 193  |       | (n = 97)   |       | (n = 96)    |       |                  |
| <b>Additional therapies during ECMO</b>          |          |       |            |       |             |       |                  |
| Prone positioning                                | 96       | (50%) | 45         | (46%) | 51          | (53%) | 0.43             |
| Nitric oxide                                     | 46       | (24%) | 22         | (23%) | 24          | (25%) | 0.83             |
| Beta blockade                                    | 14       | (7%)  | 11         | (11%) | 3           | (3%)  | 0.06             |
| Upgrade ECMO: additional cannula                 | 5        | (3%)  | 2          | (2%)  | 3           | (3%)  | 0.99             |
| Upgrade diameter cannula                         | 4        | (2%)  | 3          | (3%)  | 1           | (1%)  | 0.62             |
| Upgrade membrane (larger/2nd membrane added)     | 2        | (1%)  | 2          | (2%)  | 0           | (0%)  | 0.48             |
| Neuromuscular blockers                           | 130      | (67%) | 66         | (68%) | 64          | (67%) | 0.96             |
| <b>COVID-19 related medication</b>               |          |       |            |       |             |       |                  |
| Interleukin antagonist (i.e. anti-IL6, anti-IL1) | 3        | (2%)  | 1          | (1%)  | 2           | (2%)  | 0.99             |
| Complement inhibitors (i.e. C5(a)-inhibitors)    | 4        | (2%)  | 3          | (3%)  | 1           | (1%)  | 0.62             |
| Hydroxychloroquine                               | 49       | (25%) | 49         | (51%) | 0           | (0%)  | <b>&lt;0.001</b> |
| Lopinovir/ritonavir                              | 13       | (7%)  | 13         | (13%) | 0           | (0%)  | <b>0.001</b>     |
| Remdesivir                                       | 16       | (8%)  | 6          | (6%)  | 10          | (10%) | 0.42             |
| Imatinib                                         | 1        | (1%)  | 1          | (1%)  | 0           | (0%)  | 1.00             |
| Convalescent plasma                              | 5        | (3%)  | 1          | (1%)  | 4           | (4%)  | 0.36             |
| Tocilizumab                                      | 13       | (7%)  | 9          | (9%)  | 4           | (4%)  | 0.26             |
| Intravenous globulins (IVIG)                     | 2        | (1%)  | 2          | (2%)  | 0           | (0%)  | 0.48             |
| Corticosteroids                                  | 129      | (67%) | 45         | (46%) | 84          | (88%) | <b>&lt;0.001</b> |
| Cytokine absorber (e.g. CytoSorb)                | 25       | (13%) | 20         | (21%) | 5           | (5%)  | <b>&lt;0.01</b>  |

## Appendix VIII. COVID-19 vs. non-COVID-19

| COVID-19 vs. non-COVID-19, unweighted and unimputed                                                                                                                                                                                                                                                               |                    |               |                      |               |                  |               |                  |
|-------------------------------------------------------------------------------------------------------------------------------------------------------------------------------------------------------------------------------------------------------------------------------------------------------------------|--------------------|---------------|----------------------|---------------|------------------|---------------|------------------|
|                                                                                                                                                                                                                                                                                                                   | Overall<br>N = 309 |               | Non-COVID<br>N = 116 |               | COVID<br>N = 193 |               | P-value          |
| <i>Demographics</i>                                                                                                                                                                                                                                                                                               |                    |               |                      |               |                  |               |                  |
| Age, years                                                                                                                                                                                                                                                                                                        | 54                 | [47 - 61]     | 55                   | [45 - 62]     | 53               | [48 - 60]     | 0.62             |
| BMI, kg/m <sup>2</sup>                                                                                                                                                                                                                                                                                            | 28.4               | [25.2 - 32.1] | 27.1                 | [24.3 - 32.2] | 29.4             | [27.3 - 32.2] | <b>0.001</b>     |
| Male gender, no. (%)                                                                                                                                                                                                                                                                                              | 224                | (73)          | 74                   | (64)          | 150              | (78)          | <b>0.01</b>      |
| <i>Medical history</i>                                                                                                                                                                                                                                                                                            |                    |               |                      |               |                  |               |                  |
| mean comorbidity count                                                                                                                                                                                                                                                                                            | 0.71               | (±0.91)       | 0.53                 | (±0.72)       | 0.82             | (±0.99)       | <b>&lt;0.01</b>  |
| Hypertension                                                                                                                                                                                                                                                                                                      | 94                 | (30)          | 26                   | (22)          | 68               | (35)          | <b>0.03</b>      |
| Myocardial infarction                                                                                                                                                                                                                                                                                             | 20                 | (7)           | 9                    | (8)           | 11               | (6)           | 0.64             |
| Diabetes mellitus                                                                                                                                                                                                                                                                                                 | 57                 | (18)          | 8                    | (7)           | 49               | (25)          | <b>&lt;0.001</b> |
| COPD                                                                                                                                                                                                                                                                                                              | 22                 | (7)           | 11                   | (10)          | 11               | (6)           | 0.31             |
| Pulmonary hypertension                                                                                                                                                                                                                                                                                            | 5                  | (2)           | 2                    | (2)           | 3                | (2)           | 1.00             |
| Chronic kidney disease                                                                                                                                                                                                                                                                                            | 15                 | (5)           | 5                    | (4)           | 10               | (5)           | 0.96             |
| Liver cirrhosis                                                                                                                                                                                                                                                                                                   | 5                  | (2)           | 2                    | (2)           | 3                | (2)           | 1.00             |
| Malignancy                                                                                                                                                                                                                                                                                                        | 18                 | (6)           | 14                   | (12)          | 4                | (2)           | <b>0.001</b>     |
| <i>Values prior to ECMO</i>                                                                                                                                                                                                                                                                                       |                    |               |                      |               |                  |               |                  |
| Lactate, mmol/L                                                                                                                                                                                                                                                                                                   | 1.6                | [1.2 - 2.6]   | 1.65                 | [1.2 - 3.2]   | 1.6              | [1.2 - 2.5]   | 0.31             |
| SOFA                                                                                                                                                                                                                                                                                                              | 10                 | (± 3.2)       | 11                   | (± 3.5)       | 10               | (± 3)         | <b>0.001</b>     |
| P/F ratio, mm Hg                                                                                                                                                                                                                                                                                                  | 69                 | [54 - 99]     | 70                   | [53 - 108]    | 69               | [55 - 94]     | 0.78             |
| <i>ECMO characteristics</i>                                                                                                                                                                                                                                                                                       |                    |               |                      |               |                  |               |                  |
| Duration ICU admission - start                                                                                                                                                                                                                                                                                    |                    |               |                      |               |                  |               |                  |
| ECMO, days                                                                                                                                                                                                                                                                                                        | 5                  | [1 - 11]      | 1                    | [0 - 4]       | 7                | [5 - 14]      | <b>&lt;0.001</b> |
| ECMO duration, days                                                                                                                                                                                                                                                                                               | 13                 | [8 - 22]      | 10                   | [6 - 21]      | 15               | [9 - 24]      | 0.001            |
| Second run                                                                                                                                                                                                                                                                                                        | 15                 | (5)           | 7                    | (6)           | 8                | (4)           | 0.64             |
| <i>Complications</i>                                                                                                                                                                                                                                                                                              |                    |               |                      |               |                  |               |                  |
| Hemorrhagic event                                                                                                                                                                                                                                                                                                 | 160                | (52)          | 53                   | (46)          | 107              | (56)          | 0.11             |
| Mechanical thrombotic event                                                                                                                                                                                                                                                                                       | 49                 | (16)          | 23                   | (20)          | 26               | (14)          | 0.19             |
| Venous thrombotic event                                                                                                                                                                                                                                                                                           | 30                 | (10)          | 10                   | (9)           | 20               | (10)          | 0.75             |
| AKI                                                                                                                                                                                                                                                                                                               | 168                | (54)          | 64                   | (55)          | 104              | (54)          | 0.91             |
| Infectious event                                                                                                                                                                                                                                                                                                  | 163                | (53)          | 49                   | (42)          | 114              | (59)          | <b>&lt;0.01</b>  |
| Renal replacement therapy                                                                                                                                                                                                                                                                                         | 158                | (51)          | 61                   | (53)          | 97               | (50)          | 0.78             |
| <i>Outcomes</i>                                                                                                                                                                                                                                                                                                   |                    |               |                      |               |                  |               |                  |
| Successful weaning                                                                                                                                                                                                                                                                                                | 173                | (56)          | 74                   | (64)          | 99               | (52)          | <b>0.04</b>      |
| 28-day mortality                                                                                                                                                                                                                                                                                                  | 106                | (34)          | 39                   | (34)          | 67               | (35)          | 0.25             |
| 60-day mortality                                                                                                                                                                                                                                                                                                  | 138                | (45)          | 48                   | (41)          | 90               | (47)          | 0.37             |
| <i>Variables stated as no. (%) for categorical variables, mean ± standard deviation for parametric and median [1st quartile - 3rd quartile] for non-parametric numeric data.</i>                                                                                                                                  |                    |               |                      |               |                  |               |                  |
| <i>Abbreviations: AKI, acute kidney injury; BMI, body mass index; COPD, chronic obstructive pulmonary disease; ECMO, extracorporeal membrane oxygenation; HR, hazard ratio; ICU, intensive care unit; P/F ratio, P<sub>a</sub>O<sub>2</sub>/FiO<sub>2</sub> ratio; SOFA, sequential organ failure assessment.</i> |                    |               |                      |               |                  |               |                  |

## Appendix IX. Survival curves

### Overall survival probability waves

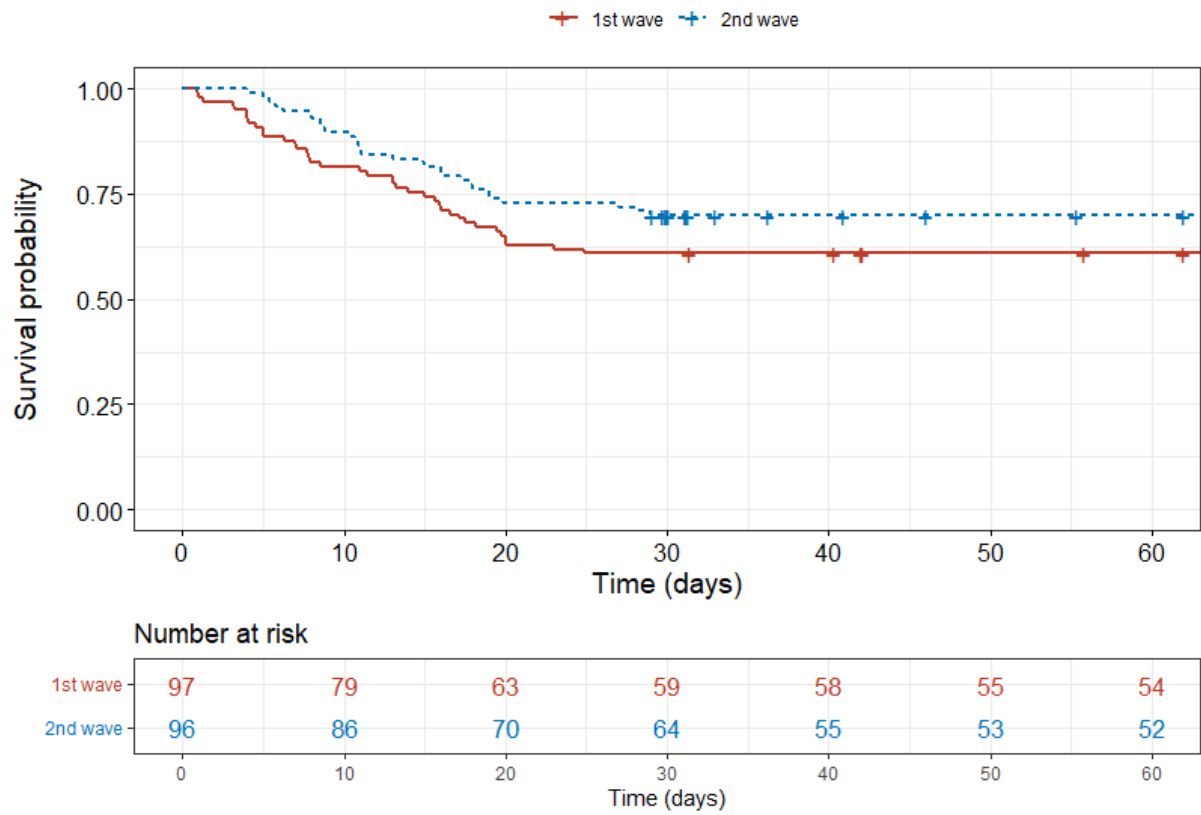

Supplement: cc9-4-e0770-s001.pdf [file cc9-4-e0770-s001.pdf]
